# Supplementary material for: A Rapid and Simple Assay Correlates In Vitro NetB Activity with Clostridium perfringens Pathogenicity in Chickens
Source: Microorganisms. 2021 Aug 11;9(8):1708. doi: 10.3390/microorganisms9081708 (PMC8400579; doi:10.3390/microorganisms9081708)
Supplement: Supplementary file 1 [file microorganisms-09-01708-s001.zip]

Archive with 4 entries (4 files):
- Document S1_Rabbit immunization protocol.pdf
- Document S2_Determining minimal serum concentration.pdf
- Document S3_NetB_doubling dilution assay.pdf
- supplementary figures.pdf
